# Supplementary material for: Impacts from cascading multi-hazards using hypergraphs: a case study from the 2015 Gorkha earthquake in Nepal
Source: Copernicus journal article supplement (doi:10.5194/egusphere-2024-1374), 2024-05-15
Supplement: Supplementary file [file egusphere-2024-1374-AC2-supplement.pdf]

# Impacts from cascading multi-hazards using hypergraphs: a case study from the 2015 Gorkha earthquake in Nepal

Response to reviewers

## Reviewers 2

Dear Authors,

I was invited to review your very interesting paper. The paper presents a hyperedge model approach for multi-hazard risk assessment, which is innovative and worth publishing. The main advantage of the method is the increased speed of calculation, and the possibility to generate many ensembles incorporating the uncertainty of the risk components.

Concerning the computational advantages of this model, I would have liked to see more information on the way of calculating using hypergraphs, in terms of software, platforms, and calculation speed.

**[Authors] The calculations were done on a MacBook Pro M1 2020 with Apple M1 chip 16GB RAM and 8 cores using Python. The model generates earthquake damage for 7.1 million buildings and 10000 landslide scenarios with impact on buildings and 3 million 100m segment of roads runs in about 15 minutes.**

The model is demonstrated on a national scale in Nepal, with the aim to evaluate the damage to individual buildings and road segments. Yet the input data is gridded, the analysis is done on slope units, and the specific exposure of individual buildings cannot be assessed, as well as the runout of landslides. It is not clear to me why you wanted to go to this building level for a national scale analysis.

**[Authors] The hyperedge methods required a conceptualisation of the system to be modelled as nodes and (hyper)edges. As the resolution of the landslide susceptibility is 10m, the impact of landslide could be computed at individual building scale. It provides us the advantage of having the freedom to scale up and assess the quality of the prediction at different aggregation levels.**

Whereas the hyperedge framework has a large potential for multi-hazard risk assessment, the multi-hazard modeling component in this paper is still rather modest. The only interaction that is considered is related to earthquake-induced landslides. Other possible follow-up cascading events, such as landslide dams, and their breakup, or debris flows are not

considered. The potential applicability of the proposed method for such more advanced interactions is mentioned in the discussion section, but not further worked out. This would be a nice topic for a follow-up publication.

**[Authors] We absolutely agree with this statement. This paper is an initial attempt of using an innovative framework for including actual cascading effects in the modelling. Using hypergraph is hazard agnostic, the logical follow up work would be to construct longer cascades.**

The paper demonstrates its applicability to simulate the earthquake damage to buildings, and the earthquake-induced landslide damage to buildings and roads for the 2015 Gorkha event. The model is trained using the 2015 Gorkha event landslide inventory, so it is in a way to be expected that the spatial patterns resemble the actual damage patterns.r4

Figure 1. Figure 1A is mostly a single hazard (although considering earthquake-induced landslides) and is also of rather poor quality. What if you would combine earthquakes with flooding, then the slope unit approach would not be appropriate? The concept of hypergraph is not clear from Figure 1b. Why are there three hypergraphs and not one or two in this example? What determines the number?

**[Authors] The image is 300 DPI so we will double check that the quality is not due to the pre-print.**

**The link between earthquake and flood could still be connected with slopes. The earthquake can activate slopes, which can trigger landslide in river segments that can then impact exposed elements through flooding (e.g. due to aggradation).**

**The incidence matrix and the connection patterns are specific to the purpose of the modelling. In this case, the cascading multi-hazard hyperedges are mapped out as interactions between earthquake, slope and assets (buildings and roads). The connections are, for now, reliant on expert opinions (e.g. we expect earthquake to have an impact on the slope and the slope to have an impact on the exposed elements).**

The method doesn't seem to analyse the direct damage due to ground shaking to roads. Why is that not considered?

**[Authors] Road damages from earthquakes are not reliably assessed from shakemaps but are rather caused by local fault displacements which locations and magnitudes are highly uncertain and was therefore not taken into account.**

Figure 2: the multi-hazard interactions when including rainfall are not addressed clearly in this figure. Rainfall-induced flooding will not be suitable to consider at a slope unit level.

Debris flows also may cover several units. And the other multi-hazard interactions (e.g. landslide dams) and post-earthquake reactivation of landslides are not considered sufficiently in this figure. Also not that the exact interaction between landslides and infrastructure is not considered. Perhaps you could draw some hypothetical slope units with roads and buildings, and show which components are in the model and which are not?

**[Authors] Indeed, flooding would necessitate a specific mapping of the interactions with the other processes. However, even if flooding is an important hazard in the Nepalese landscape, it was not in the mandate of the paper.**

As you mentioned in the discussion section the model might not work for debris flows that reach valleys, and to settlements and roads that are located at the outlet of valleys, as the model only considers slope units.

**[Authors] Indeed, we would need to consider how debris flow can be integrated and conceptualized into the graphical approach.**

It would be relevant to explain how the building dataset from METEOR was generated and how this could include the construction types and building values for the whole of Nepal. A description of the uncertainties involved would be helpful.

**[Authors] The METEOR project derived EO products to classify homogeneous regions characterized by differing levels of urbanization, including rural areas, residential neighbourhoods, urban centres, and industrial zones. These homogeneous regions, termed "development patterns," are associated with a "mapping scheme," which represents the distribution of structural attributes and profiles specific to each development pattern. The mapping schemes are developed by engineers who consult scholarly literature, building codes, and satellite/ground imagery to determine a country's traditional construction methods, common building materials, and engineering requirements. This information aids in estimating vulnerability classes and replacement costs. Structural distributions for each development pattern within a country are then constructed using nationwide census data in conjunction with satellite and ground-based observations (Kathmandu Living Labs for Nepal).**

**(<https://nora.nerc.ac.uk/id/eprint/533439/>) – reference added to the manuscript. The capacity of the method to map out exposure was based on the city of Los Angeles where the datasets and census data are robust enough for validation for different levels of aggregation. The validation was done based on the comparison of the square footage from the EO protocol with the square footage from the census data, showing a good alignment. The vulnerability data, as far as I could find, was validated by cross referencing the EO mapping scheme with on-the-ground sampling of few thousands of buildings in Nepal.**

The fragility curves presented in Figure 3 show that even with extreme levels of ground shaking over 1.5 g many building types do not result in complete damage in the low Case (e.g. unreinforced fieldstone not reaching more than 60% probability of complete damage with PGA of 3 g). Unreinforced masonry with cement mortar seems to be more vulnerable than mud mortar in the higher probability range. This is also counterintuitive, and requires further explanation, as also the large deviation of the lower curve.

**[Authors] After a literature review of the different fragility functions available for Nepal, it was clear that large discrepancies existed in vulnerability estimations. Hence, the decision was made to include a High, Mid and Low case based on the upper and lower bound fragility functions found in scientific literature to compensate for the lack of consistency in vulnerability measures. Unreinforced masonry with mud mortar, in the mid case would reach complete 50% probability of building damage for a PGA of ~0.2g while, for unreinforced cement mortar it would take double the PGA value to achieve the same probability of damage.**

The use of a static susceptibility model which is trained on the landslide inventory caused by the Gorkha earthquake, without including the earthquake shaking as a causal factor, might be problematic.

The simulation takes quite a few shortcuts or assumptions, which are understandable given the limited data availability. The threshold used for defining the slope units with landslides based on the relation between PGA and landslide occurrence during the Gorkha earthquake doesn't take into account the terrain conditions.

**[Authors] The shaking value is included in the cascading chain as a triggering factor for the slope units based on the threshold values observed during Gorkha as described Lines 286-288. Earthquake shaking was discretized from topographic factors (contained in the 10m resolution susceptibility map) to allow the flexibility to vary earthquake scenarios.**

276-278: Can you explain how you can sum up the probabilities of the individual buildings per slope unit / administrative unit to obtain the number of destroyed buildings? E.g. if you have 100 buildings, each with a 50% probability of failure, do you then have 50 destroyed buildings?

**[Authors] Yes, the example you gave is the correct assumption.**

280-291 When you assess the relation between PGA and landslides on the basis of the Gorkha earthquake inventory, will the results then not mimic the situation of the Gorkha earthquake?

**[Authors] Yes, indeed. We realize that the argument is cyclical, but we were constrained by the data availability in Nepal.**

Also if the relation between PGA and landslides does not take into account other covariates, would this not have the effect that slope units that are not very steep but a high PGA are still "activated" ? the sentence "That probability, in turn, is compared with a uniform random deviate to determine whether each slope unit is activated or not" is not clear and could be explained better.

**[Authors] The landslide hazard is managed in three steps through the use of uniform random deviate. First, through a stochastic activation of the slope units if the PGA is large enough (i.e. the slope can potentially generate landslides). Second, through the sampling of the susceptibility distribution in the slope unit as a proxy for topographic covariate (i.e. the slope generate landslides). Third, sampling the susceptibility at the exposed element scale (i.e. is the exposed element impacted by a landslide runout).**

**It is possible to generate scenario where a high PGA would "activate" the slope unit but will not "trigger" landsliding because a flat topography point to a low probability of occurrence. We will add to the paper.**

295 "We first check if a landslide occurred within the slope unit" Why was this done? Is the analysis then not biased toward replicating the landslide inventory?

**[Authors] In the context of the multi-hazard algorithm, the sentence refers to the sampling of the susceptibility distribution of the slope units. If the value sampled exceeds a random uniform sample, a landslide is "occurring". As mentioned, the susceptibility model is based on existing inventory from the Gorkha earthquake, as few others are available, hence a bias exist toward the Gorkha event.**

299 How is this uniform random deviate (B) determined?

**[Authors] The value sample is coming from a uniformly distributed over the half-open interval [0, 1). In other words, any value within the given interval is equally likely to be drawn. This additional information has been added to the manuscript Line 300.**

303-305: if within a slope unit potentially landslides are triggered, how do you then determine how many buildings and roads would be impacted? Here again, you use a random value. The use of these random values in the method is not clear.

**[Authors] for each building and road, a distribution of susceptibility values is available. From those individual distributions, a value is drawn. This value is then compared with a random uniform draw from 0 to 1. The purpose of this comparison is to allow the highest**

susceptibility to mostly allow an impact but not always. This is a way to generate cascading effects that explore the uncertainty space and create different risk scenarios.

316-318: you create 10000 scenarios but these are all related to the Gorkha earthquake?

**[Authors] In this paper, the initial simulation is the Gorkha shaking indeed. The 10000 scenarios are not all identical because of the random value generations.**

387-389: What are the reasons for the over-and-under prediction? You are discussing these in the discussion section, but have you tried to reduce this overprediction by adjusting certain components?

**[Authors] This question was investigated and pointed to the PGA being the influencing factor as well as some typologies to a lesser extent. Below is a SHAP analysis of the relative error prediction at District levels. As Gorkha is our single reference point, we decided to present the raw results. For future work, a PGA cut off might be applied.**

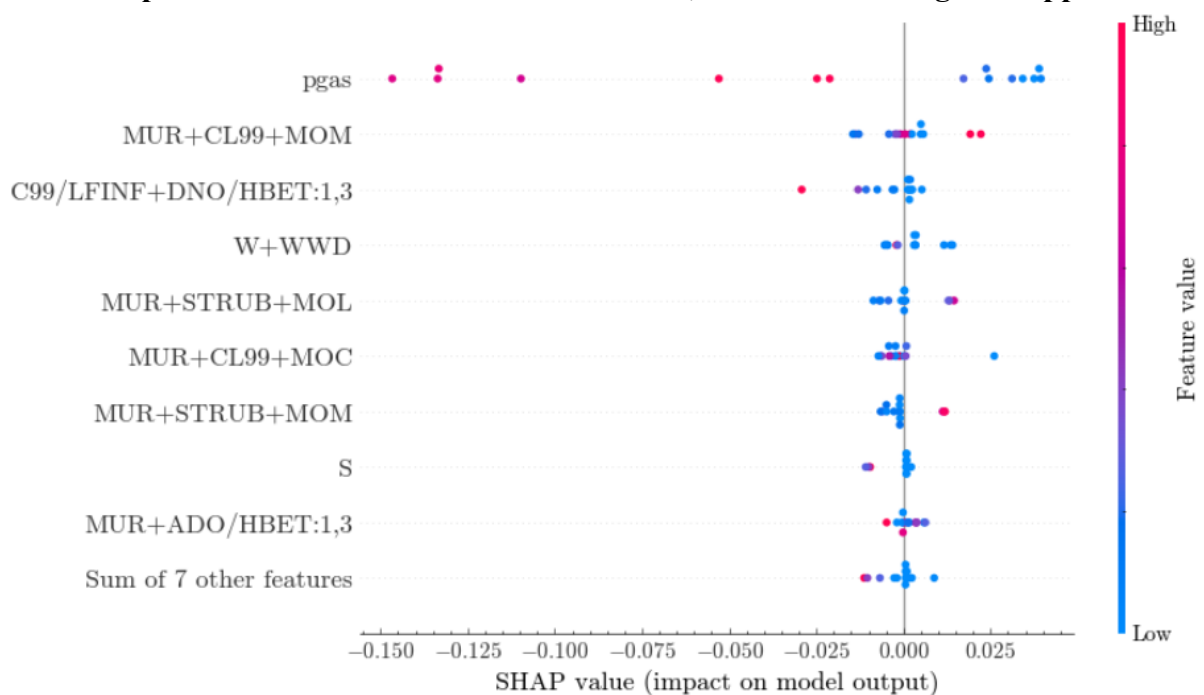

Figure 5: the red contours are poorly visible. You might want to show them in a separate figure, and not repeat them in each map.

**[Authors] The Figures will be updated as per the comments of the other reviewer as well.**

Figure 6 is quite complex and is not focusing on the main topic of the paper. It is replicating single hazard earthquake building losses for a scenario earthquake. There are quite some outliers in this graph with large differences between observed and predicted. Isn't it logical that for most of the districts the results fall in between the low and high values?

**[Authors] Figure 6 is an output of the multi-hazard model as there is no distinct model assessing the earthquake and the landslide separately. The low and high values are the results of the weighted mean of the high case and low case for each building and their specific topologies aggregated at the district scale. Hence it is possible, due to the uncertainty in the fragility functions and shake map, that the model bounds events wouldn't accurately represent the actual event.**

Figure 7: The density of information in these maps is very high, and that makes them difficult to interpret. The actual landslide impacts are often overprinted by the other information, especially in A and D. PGA contours could be left out, and the color scale adjusted as most values are blue and it is not possible to see if red areas are due to the crosses or to the map values.

**[Authors] Figure 5 and 7 will be updated for clarity.**

459-462: could the weaker relation for earthquake-induced landslides not be due to the separation of the triggering PGA values to activate the slope unit, and the separate susceptibility values that were not considering PGA values?

**[Authors] From the USGS shake map, it seems that PGA values are not varying drastically over the slope units area most likely due to the lack of capacity to model high resolution amplification effect. Hence, the dynamic addition of PGA separately from the topographic variables is not expected to have large differences with the a joined susceptibility values.**

Figures 8 and 9: even though the overprediction of building damage is on the order of 50-100 times, and road damage of 20-25, the AUC values seem to be very good. Is this not caused by the many administrative units that didn't have damage at all? Or is it simply predicting damage/no damage per administrative unit? In that case, the figure is not so meaningful.

**[Authors] We believe that the AUC score, indeed high, are the results of the imbalance in the landslide impact, with many unaffected buildings and roads. To address this issue we used the F1 score as it takes into account both precision and recall, which are important metrics for imbalanced datasets.**

In the discussion, it is mentioned that the modeling was only done for the 2015 Gorkha earthquake that occurred on 25 April 2015, excluding the event of 12 May 2015. How did you separate the landslides caused by these two earthquakes? I understood that due to the fact that they occurred close to each other, the mapping of the co-seismic landslides could not differentiate well between the landslides caused by both events.

**[Authors] This topic was indeed discussed during the project but, as you mentioned, the two landslide inventories couldn't be differentiated and, therefore, an the "aggregated" landslide inventory combining the two events was used.**

For the modeling of earthquake-induced landslides it might be considered to apply Spatio-temporal data-driven modeling (e.g. Dahal, A., Tanyas, H., van Westen, C., van der Meijde, M., Mai, P. M., Huser, R. and Lombardo, L. (2024c) Space-time landslide hazard modeling via ensemble neural networks. *Natural Hazards and Earth System Sciences* 24(3), 823–845. It might be good to address this a bit more in the discussion section.

In how far do the interpolated PGA values correctly represent the effect of topography, and would PGA values be the best predictor for landslide occurrence alone (See also: Dahal, A., Tanyaş, H. and Lombardo, L. (2024b) Full seismic waveform analysis combined with transformer neural networks improves coseismic landslide prediction. *Communications Earth & Environment* 5(1), 75.)

**[Authors] Thank you for the very interesting references. As the purpose of the paper was to develop a dynamic cascading framework across different hazards, we consider in this initial case study the immediate cascade from an earthquake and the subsequent damages to infrastructures. The temporality aspect and the reference you mentioned could potentially be combined with a graphical method to explore deeper cascading effects with improved susceptibility models included.**

The reference to Fan et al. 2019 is missing in the reference list.

**[Authors] Amended**
